# Supplementary material for: Antioxidant and Anti‐inflammatory Effect of Cannabidiol Contributes to the Decreased Lipid Peroxidation of Keratinocytes of Rat Skin Exposed to UV Radiation
Source: Hindawi journal article supplement (doi:10.1155/2021/6647222), 2021-01-01
Supplement: f1 [file 6647222.f1.docx]

**Supplementary file SF1.**

Western blot analysis of the keratinocytes of the skin of control rats, as well as rats’ skin for 4 weeks exposed every 48 hours to UVA (dose increased from 0.5 to 5 J/cm2) or UVB radiation (dose increased from 0.02 to 2 J/cm2) and/or every 12 hours to the action of cannabidiol (CBD; 2.5% w/w).

**
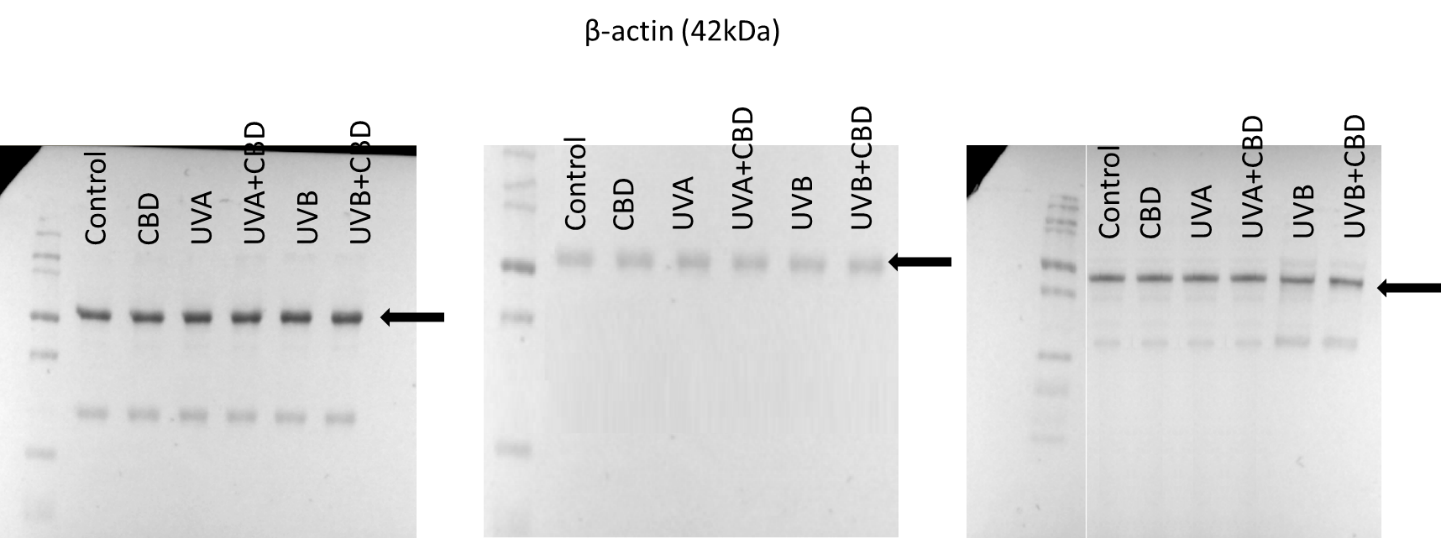
**

**
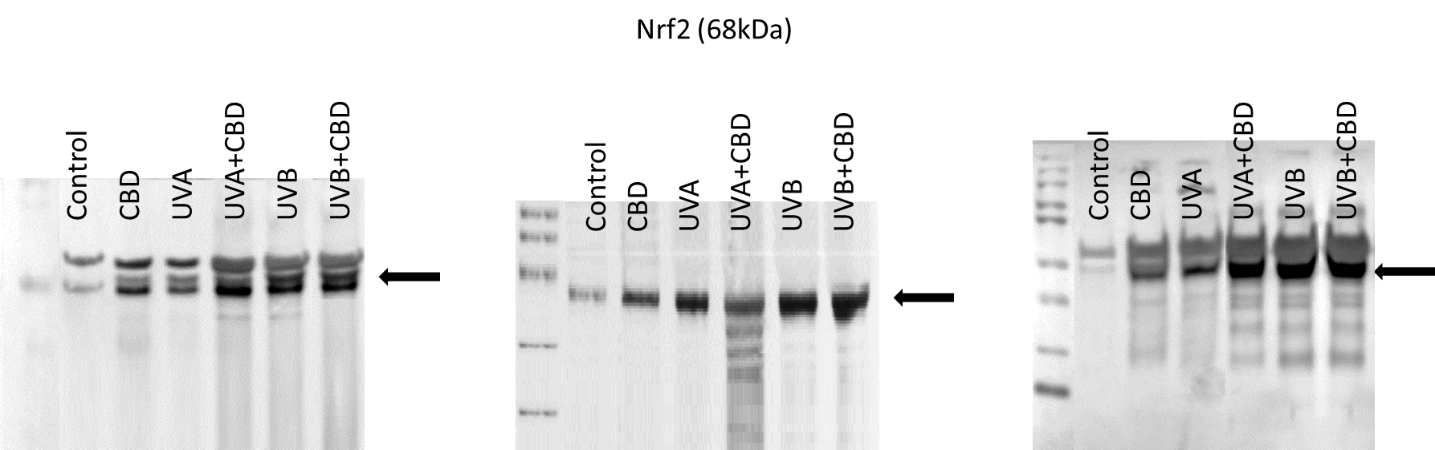
**

**
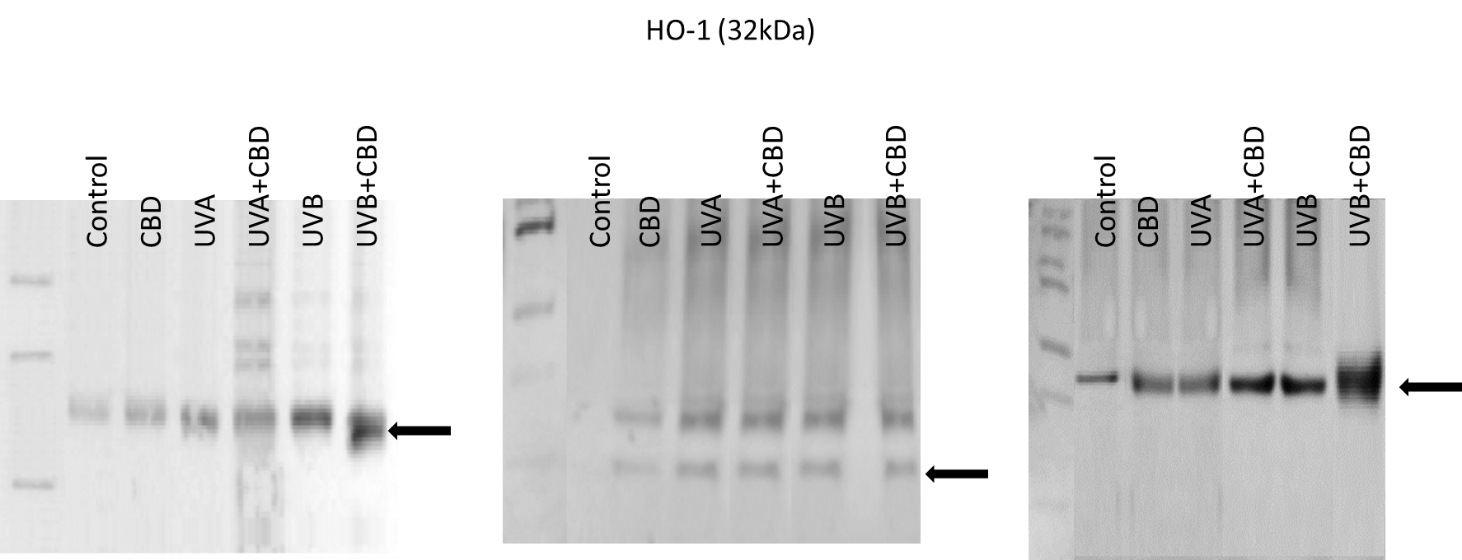
**

**
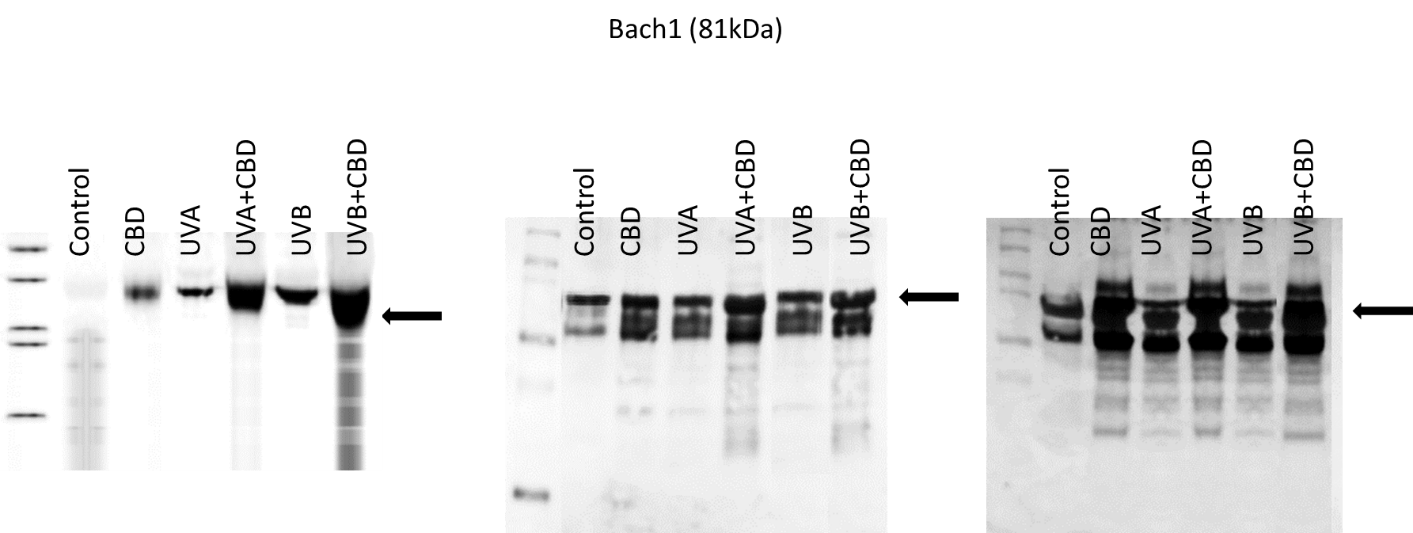
**

**
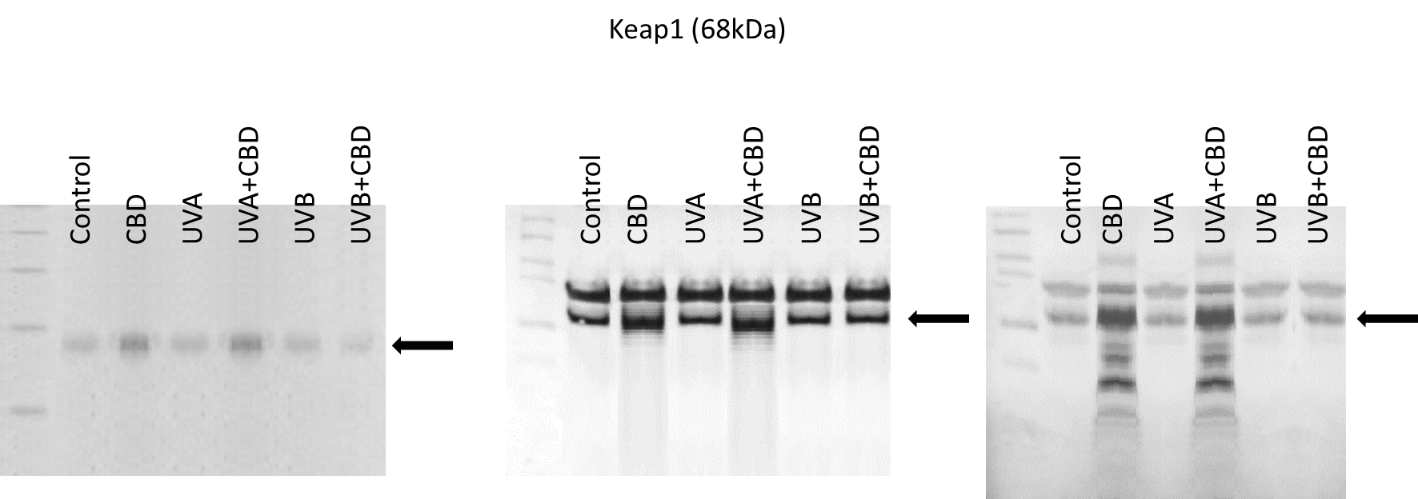
**

**
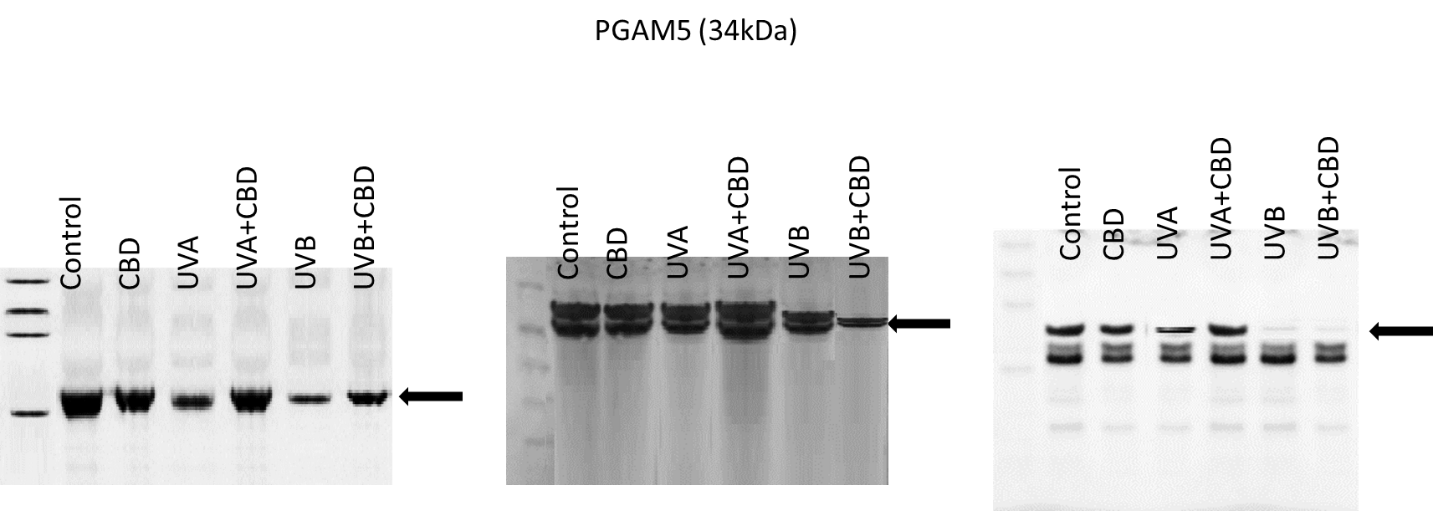
**

**
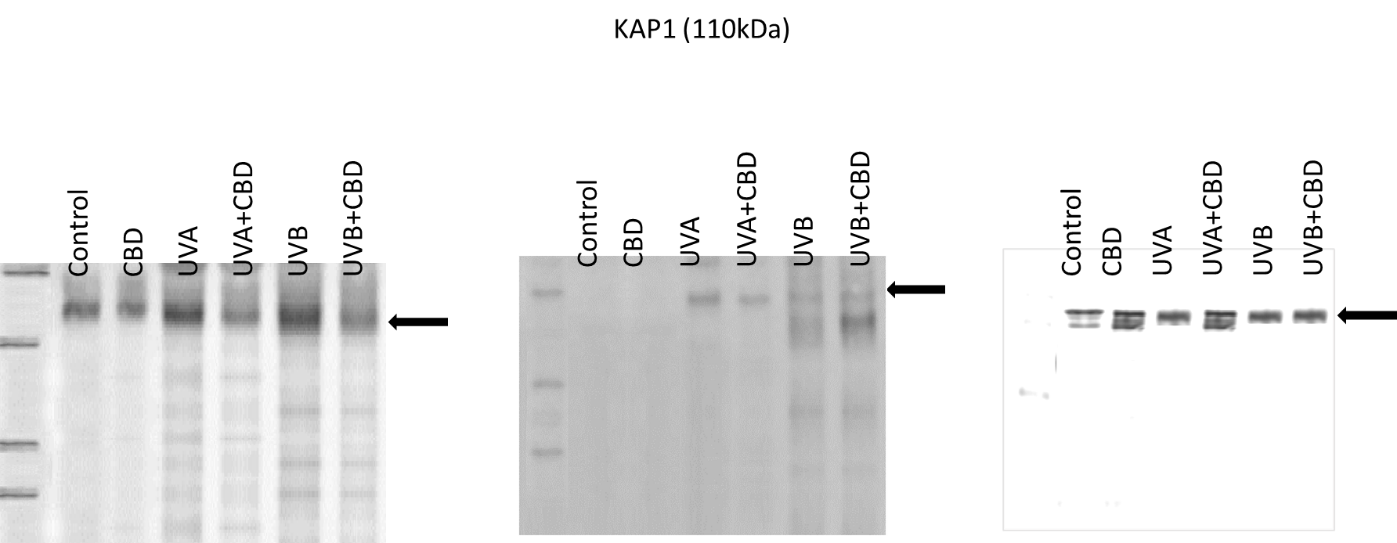
**

**
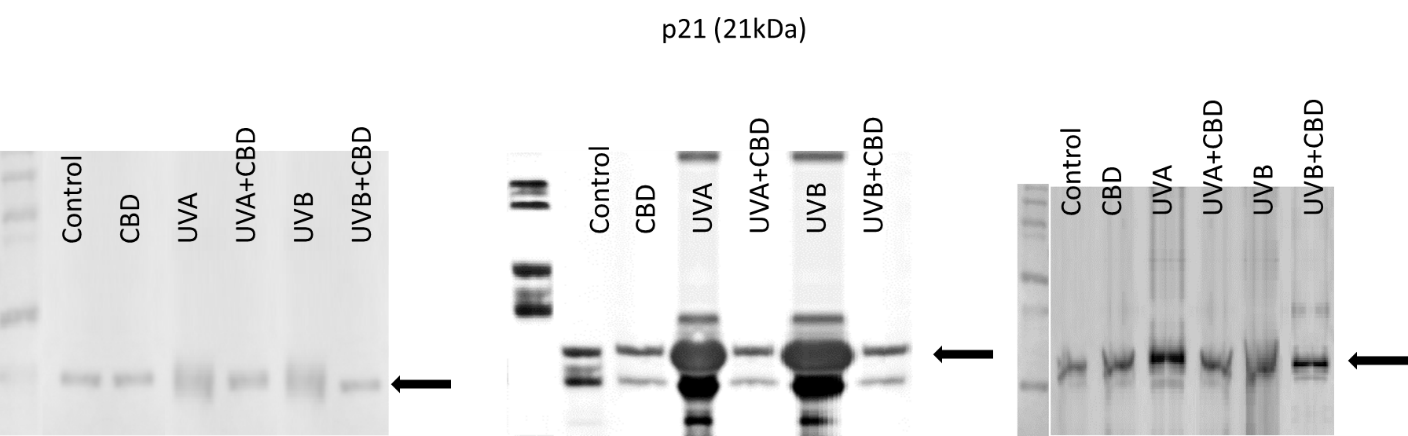
**

**
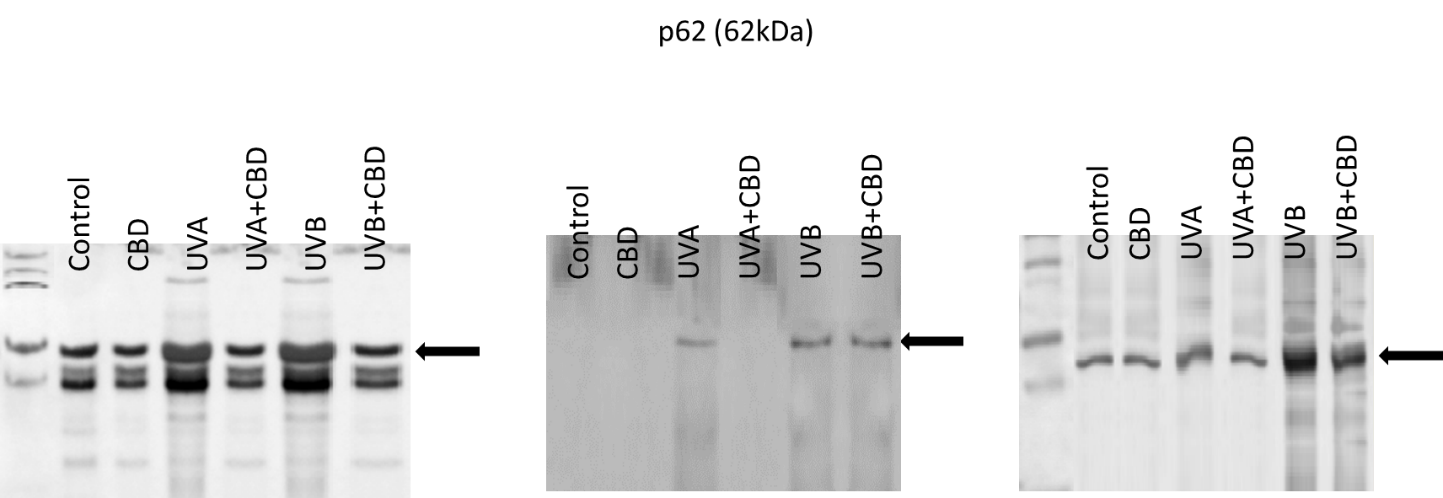
**

**
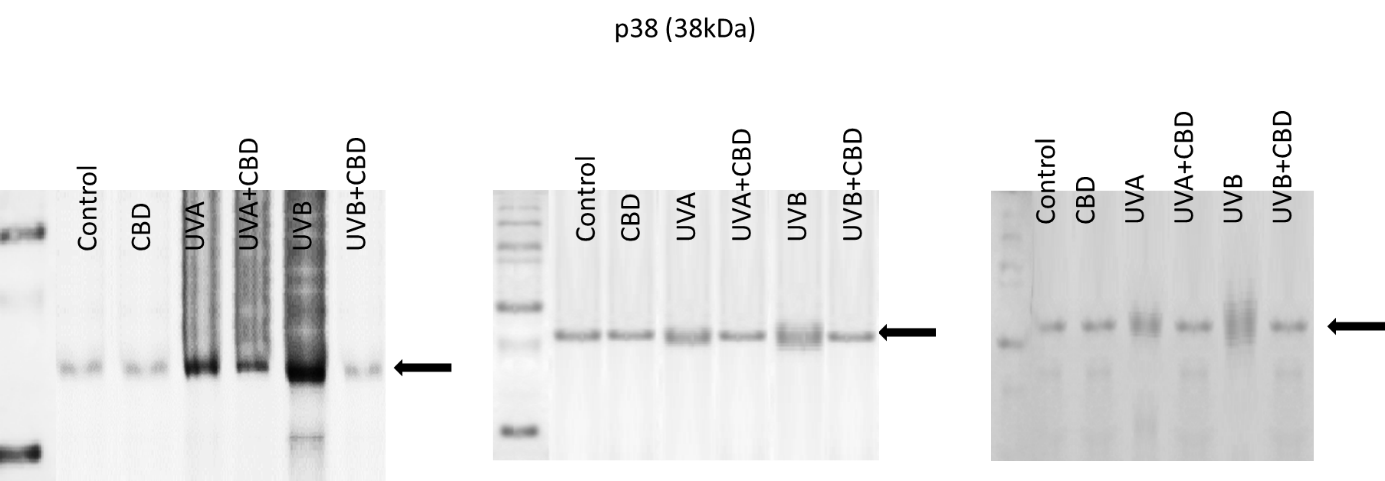
**

**
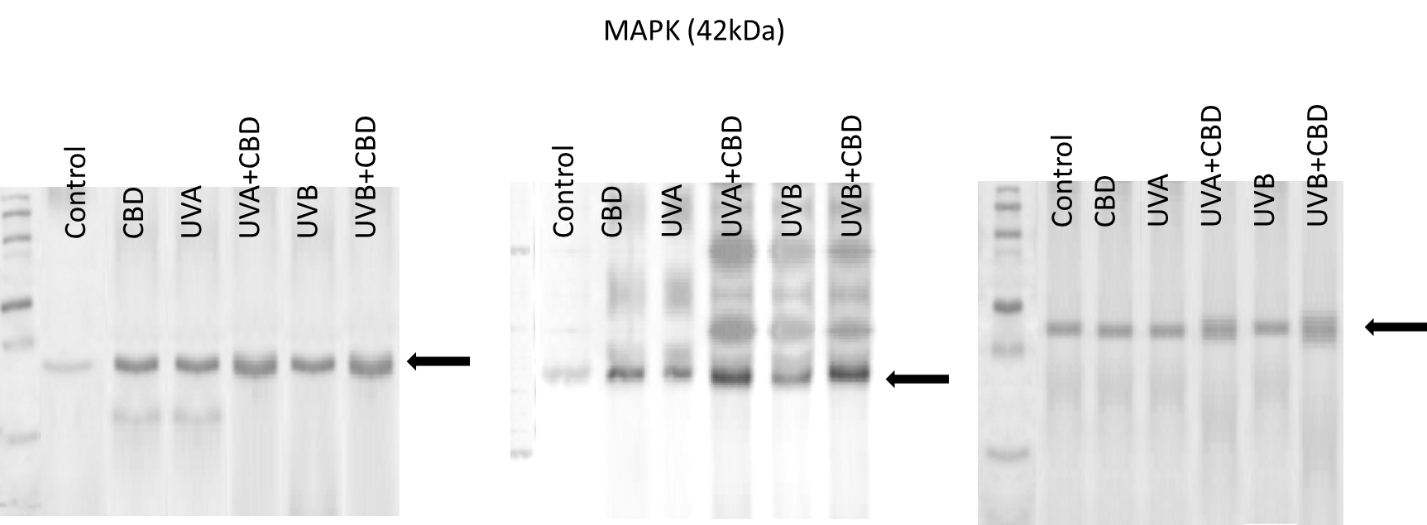
**

**
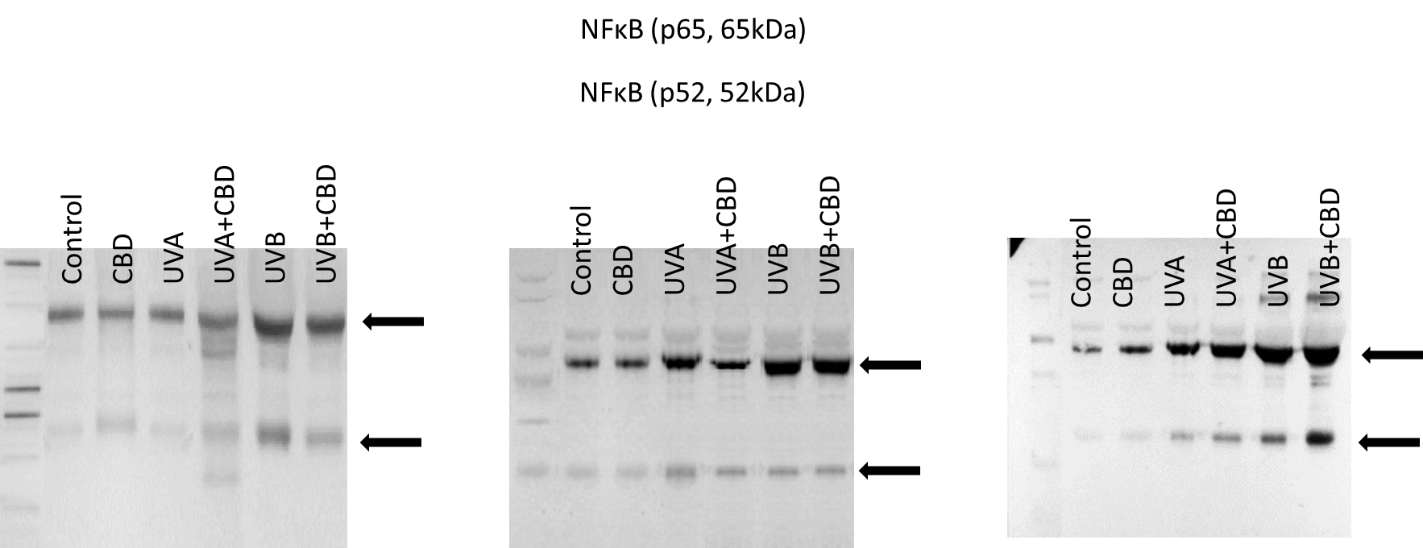
**

**
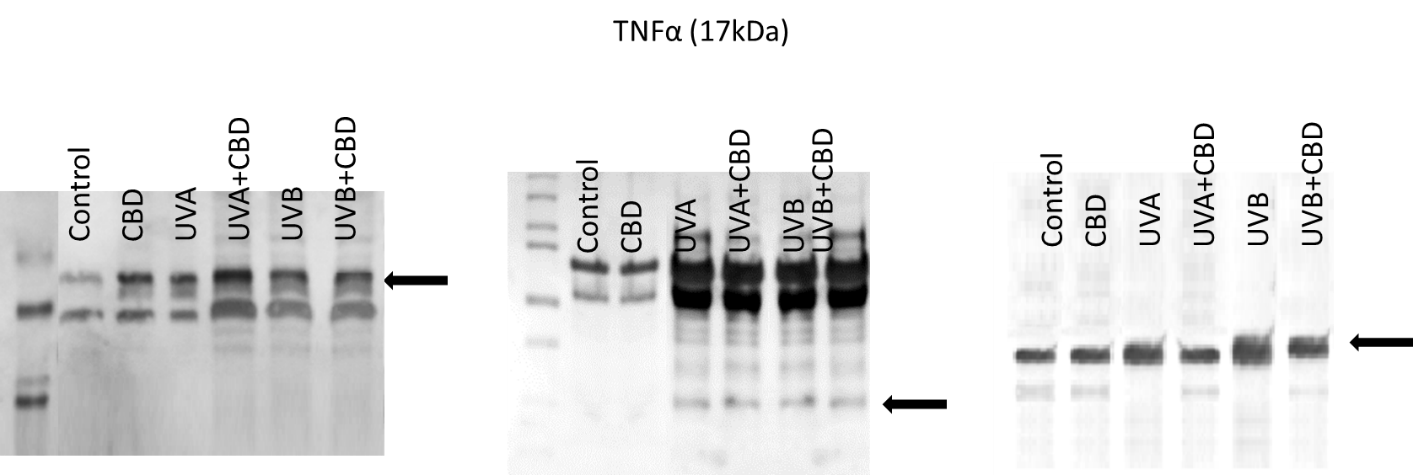
**

**
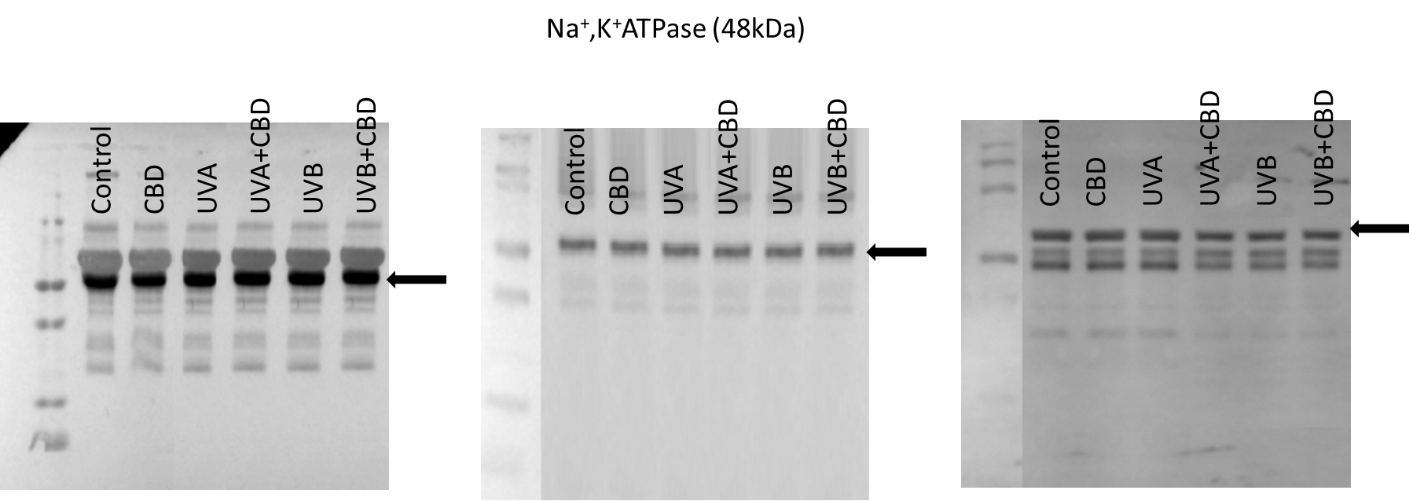
**

**
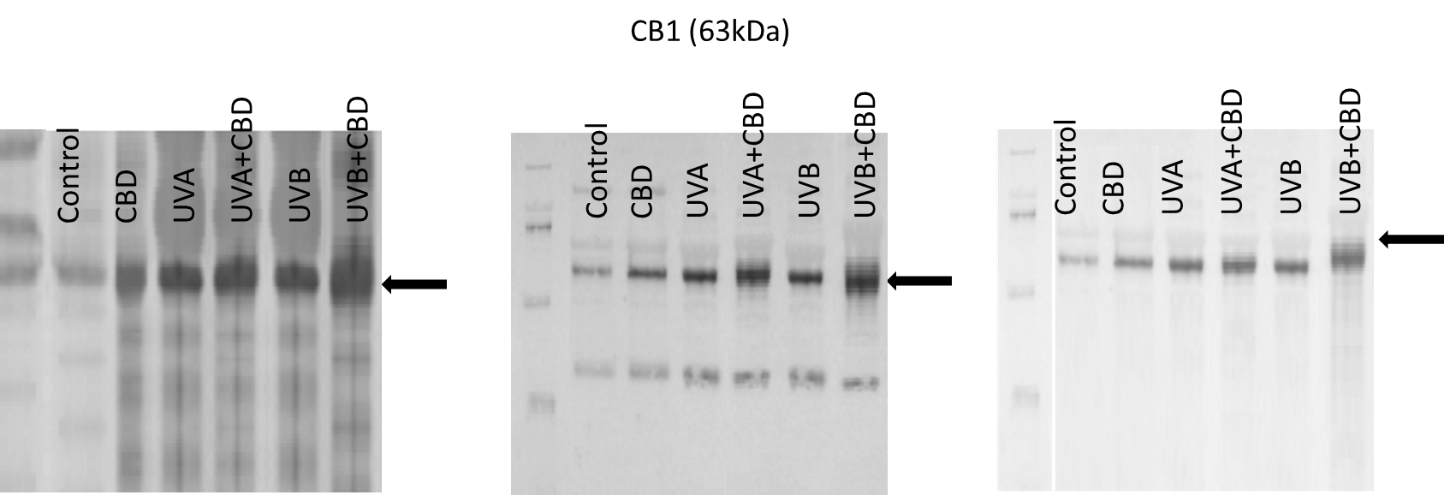
**

**
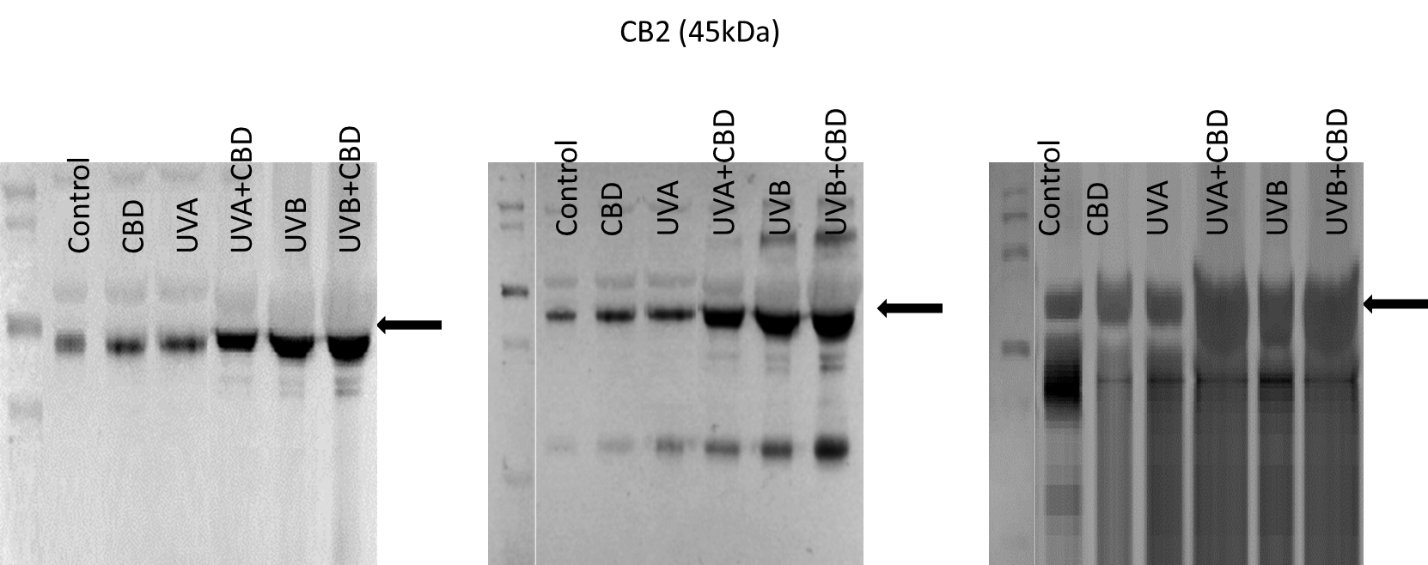
**

**
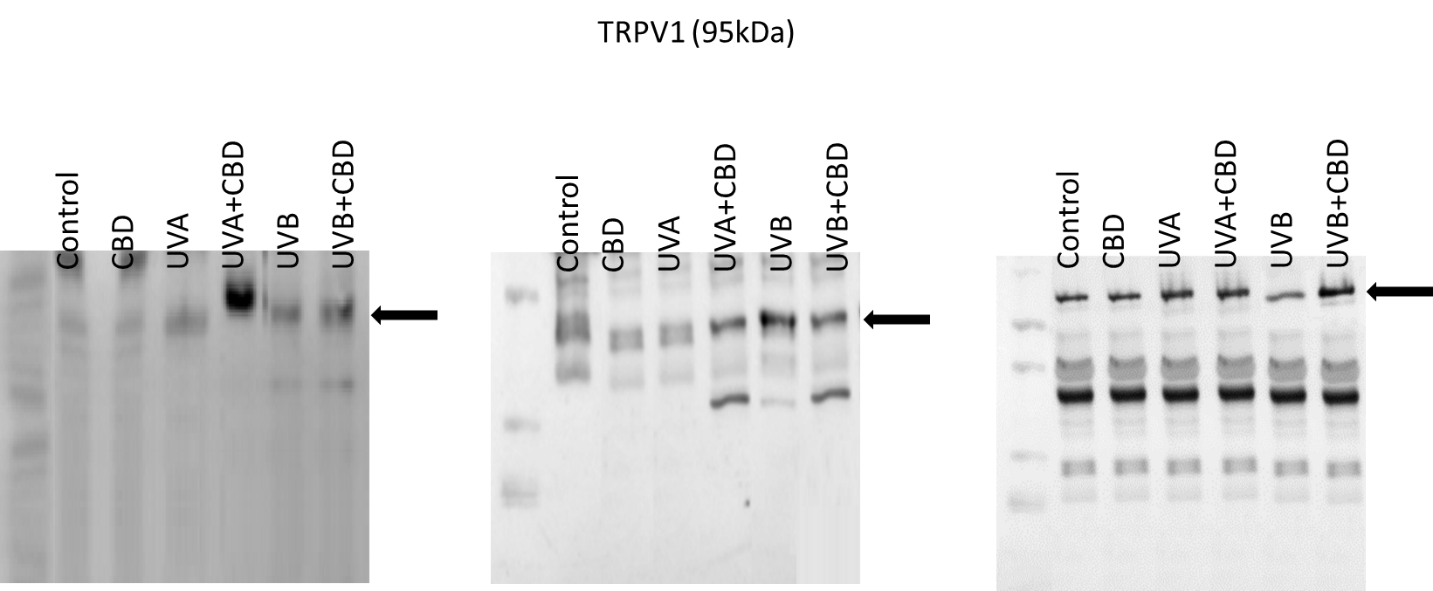
**
